# Supplementary material
Source: PubMed Central journal article supplement (PMC7480733)
Supplement: Supp_FigS1.pdf [file Supp_FigS1.pdf]

### Supplementary Data

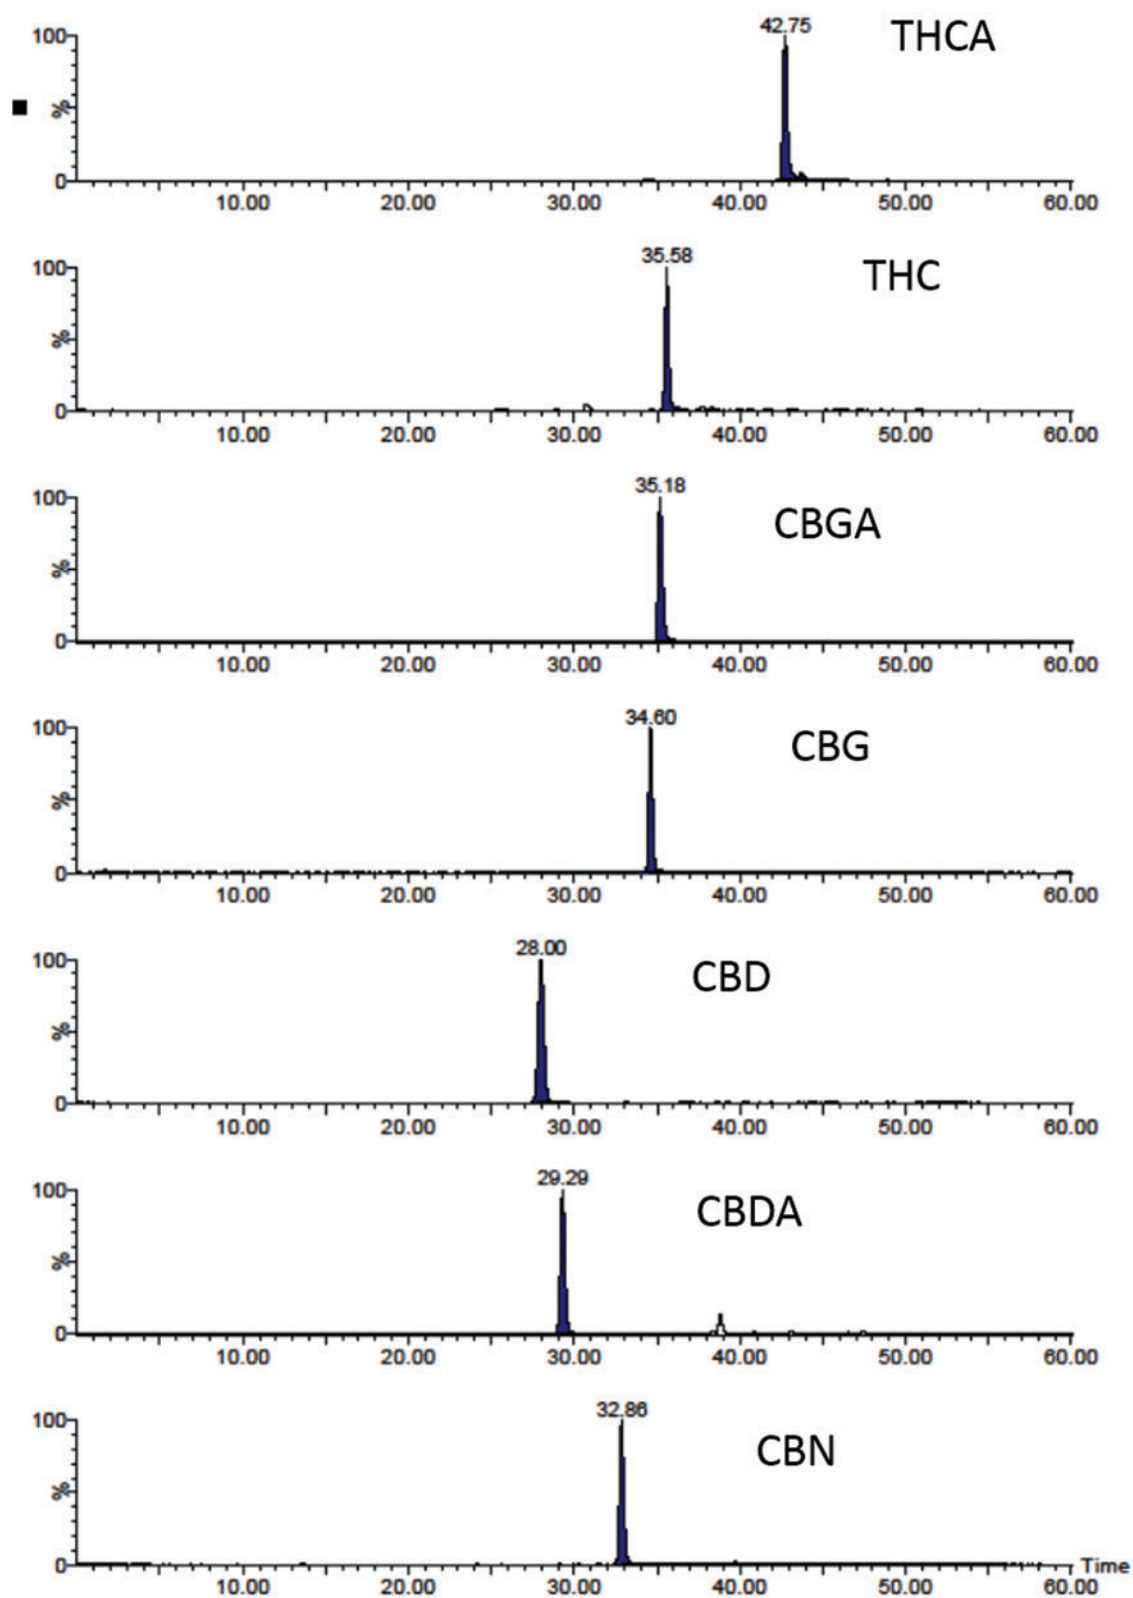

**SUPPLEMENTARY FIG. S1.** Representative LC-MS chromatograms of cannabinoid standards.
