# Supplementary material
Source: PubMed Central journal article supplement (PMC7480733)

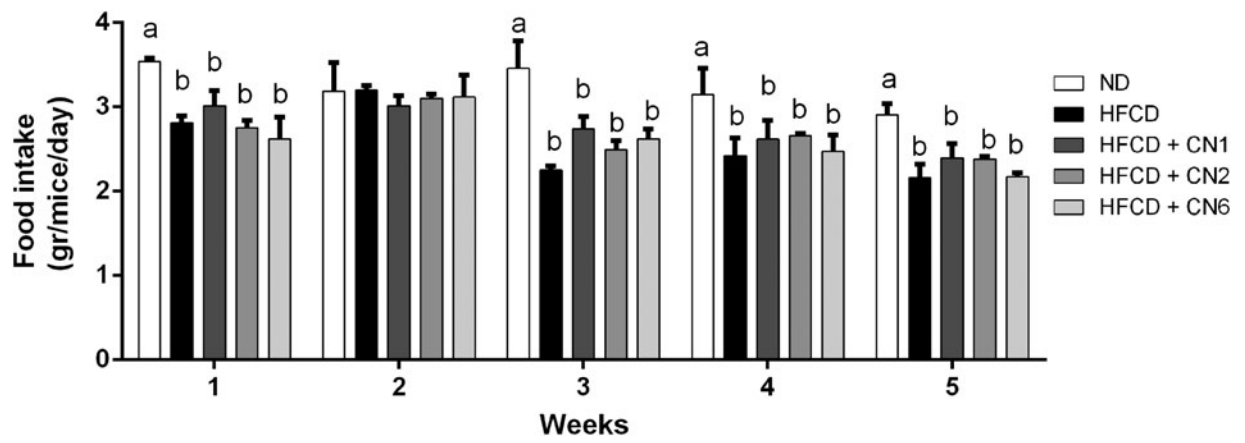

**SUPPLEMENTARY FIG. S2.** Weekly food consumption.

Supplement: Supp_FigS2.pdf [file Supp_FigS2.pdf]
